# Supplementary material
Source: MDPI journal article supplement (https://www.mdpi.com/1424-2818/16/4/242)
Supplement: s1 [file s1]

# Supplementary material for

## Abundant Species Govern the Altitude Patterns of Bacterial Community in Natural and Disturbed Subalpine Forest Soils

Chaonan Li <sup>1</sup>, Haijun Liao <sup>1,2</sup>, Dehui Li <sup>1</sup> and Yanli Jing <sup>1,\*</sup>

<sup>1</sup> Ecological Security and Protection Key Laboratory of Sichuan Province, Mianyang Normal University, Mianyang 621000, China; licn@mtc.edu.cn (C.L.); liaohj@mtc.edu.cn (H.L.); dehui@mtc.edu.cn (D.L.)

<sup>2</sup> Engineering Research Center of Chuanxibei RHS Construction at Mianyang Normal University of Sichuan Province, Mianyang Normal University, Mianyang 621000, China

\* Correspondence: jingyanli@mtc.edu.cn

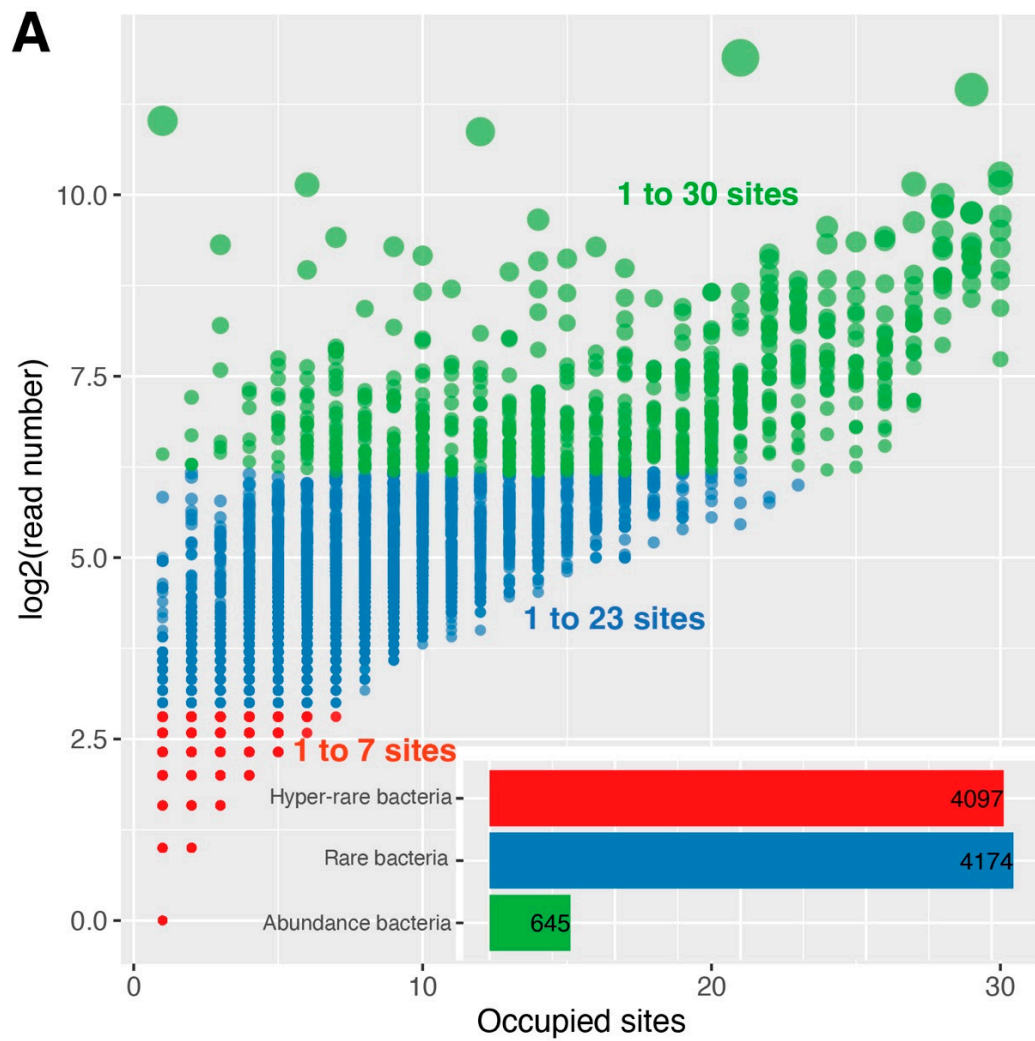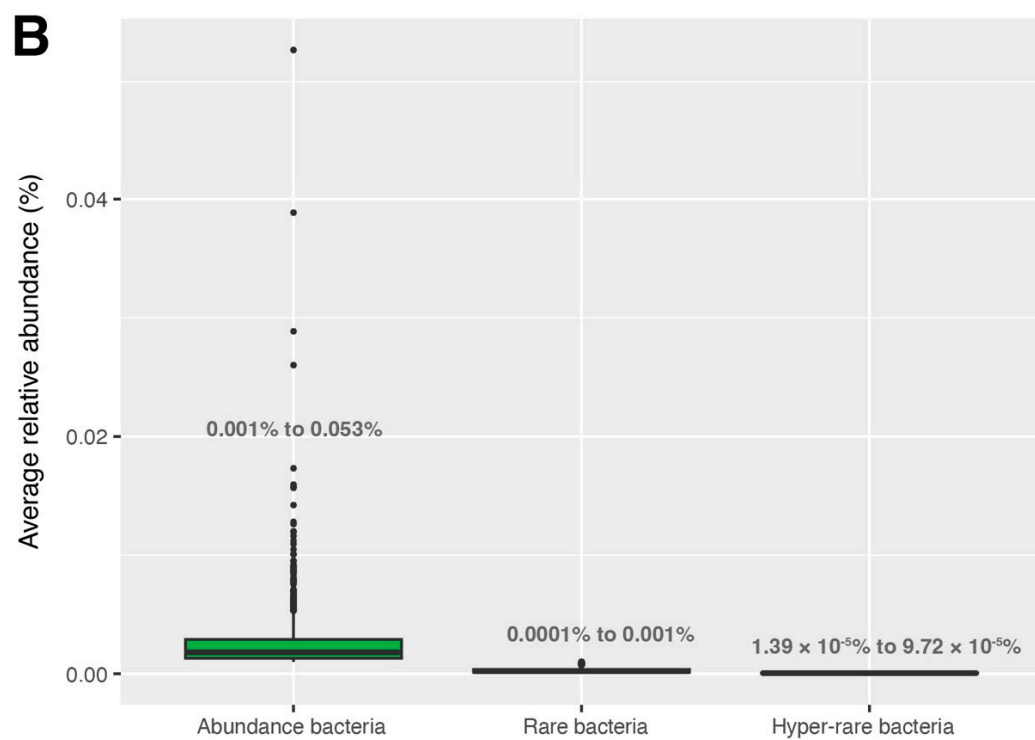

**Figure S1** The distributions of amplicon sequence variants (ASVs) with varying average relative abundances in 30 soil samples (A), and the average relative abundances (RB) of abundant (RB  $\geq$  0.001%), rare ( $0.0001\% \leq$  RB  $<$  0.001%) and hyper-rare (RB  $<$  0.0001%) bacteria (B).

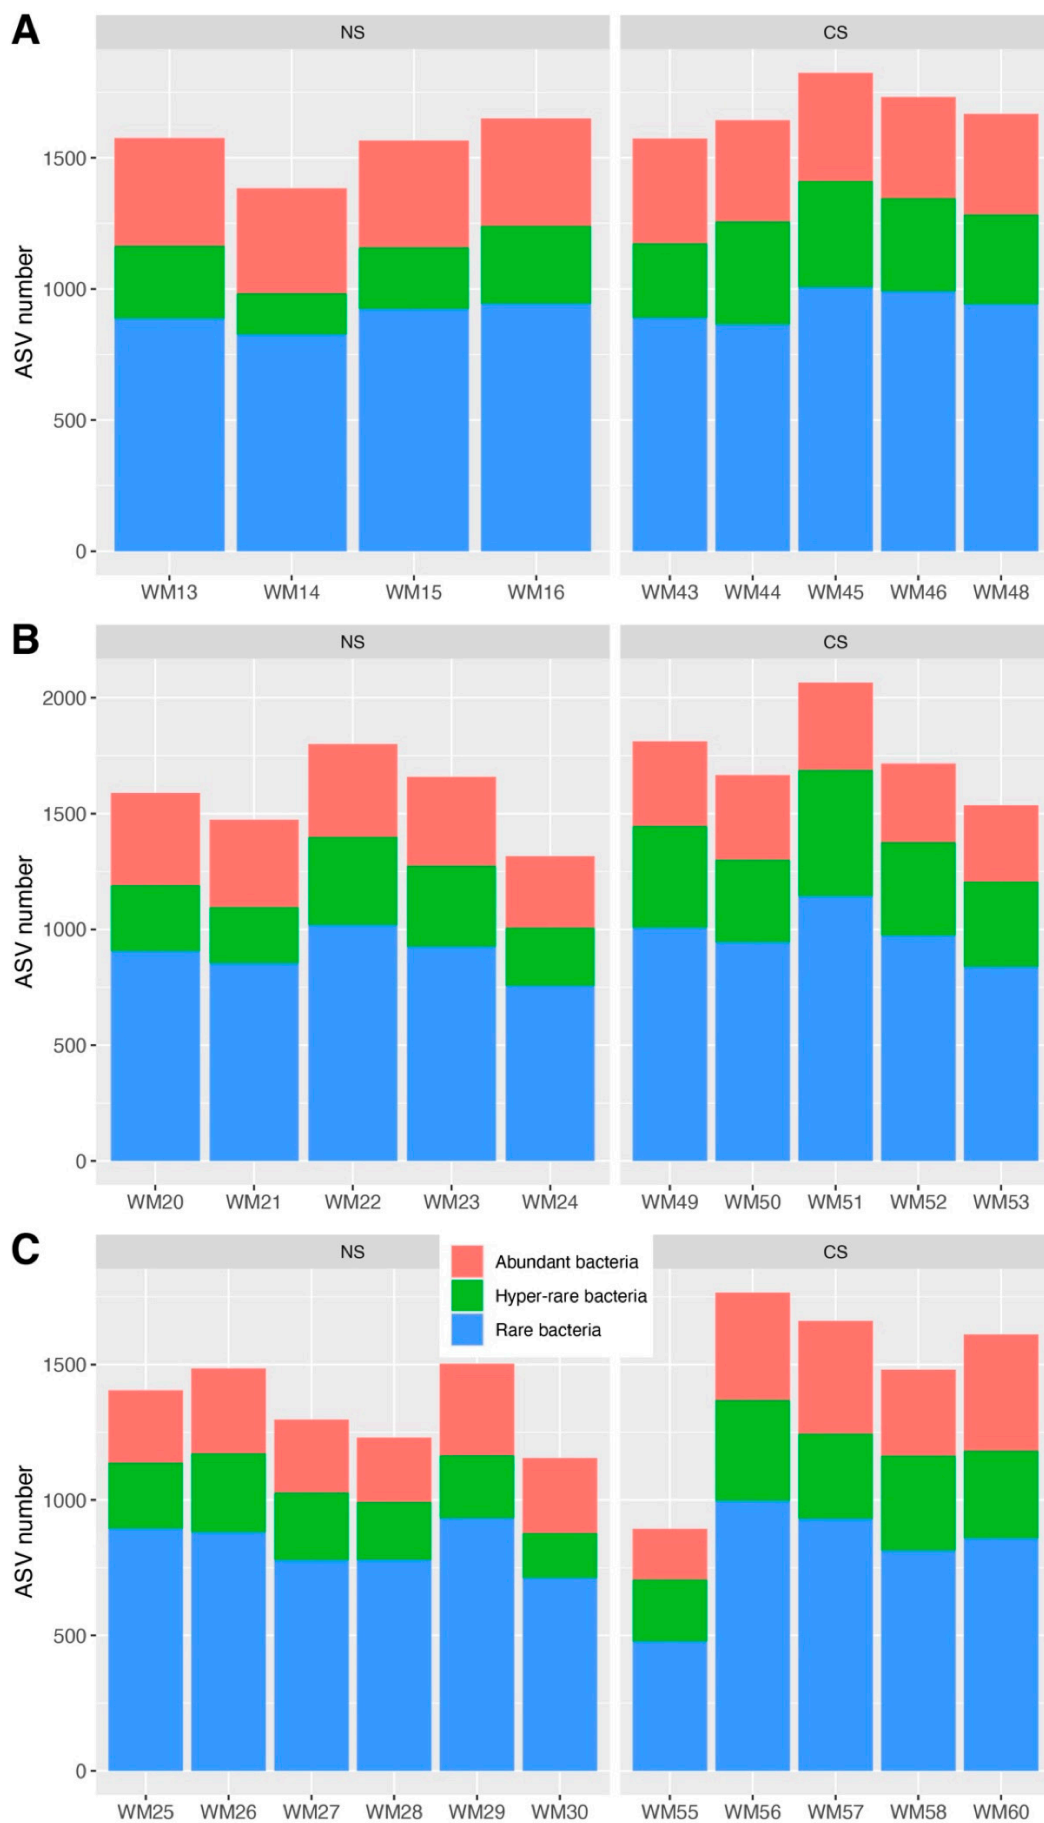

**Figure S2** The ASV numbers of abundant ( $RB \geq 0.001\%$ ), rare ( $0.0001\% \leq RB < 0.001\%$ ) and hyper-rare ( $RB < 0.0001\%$ ) bacteria in soils sampled from 2900 m (A), 3102 m (B) and 3194 m (C). ASV: amplicon sequence variant; RB: average relative abundance; NS: natural soils; CS: cut slope soils.

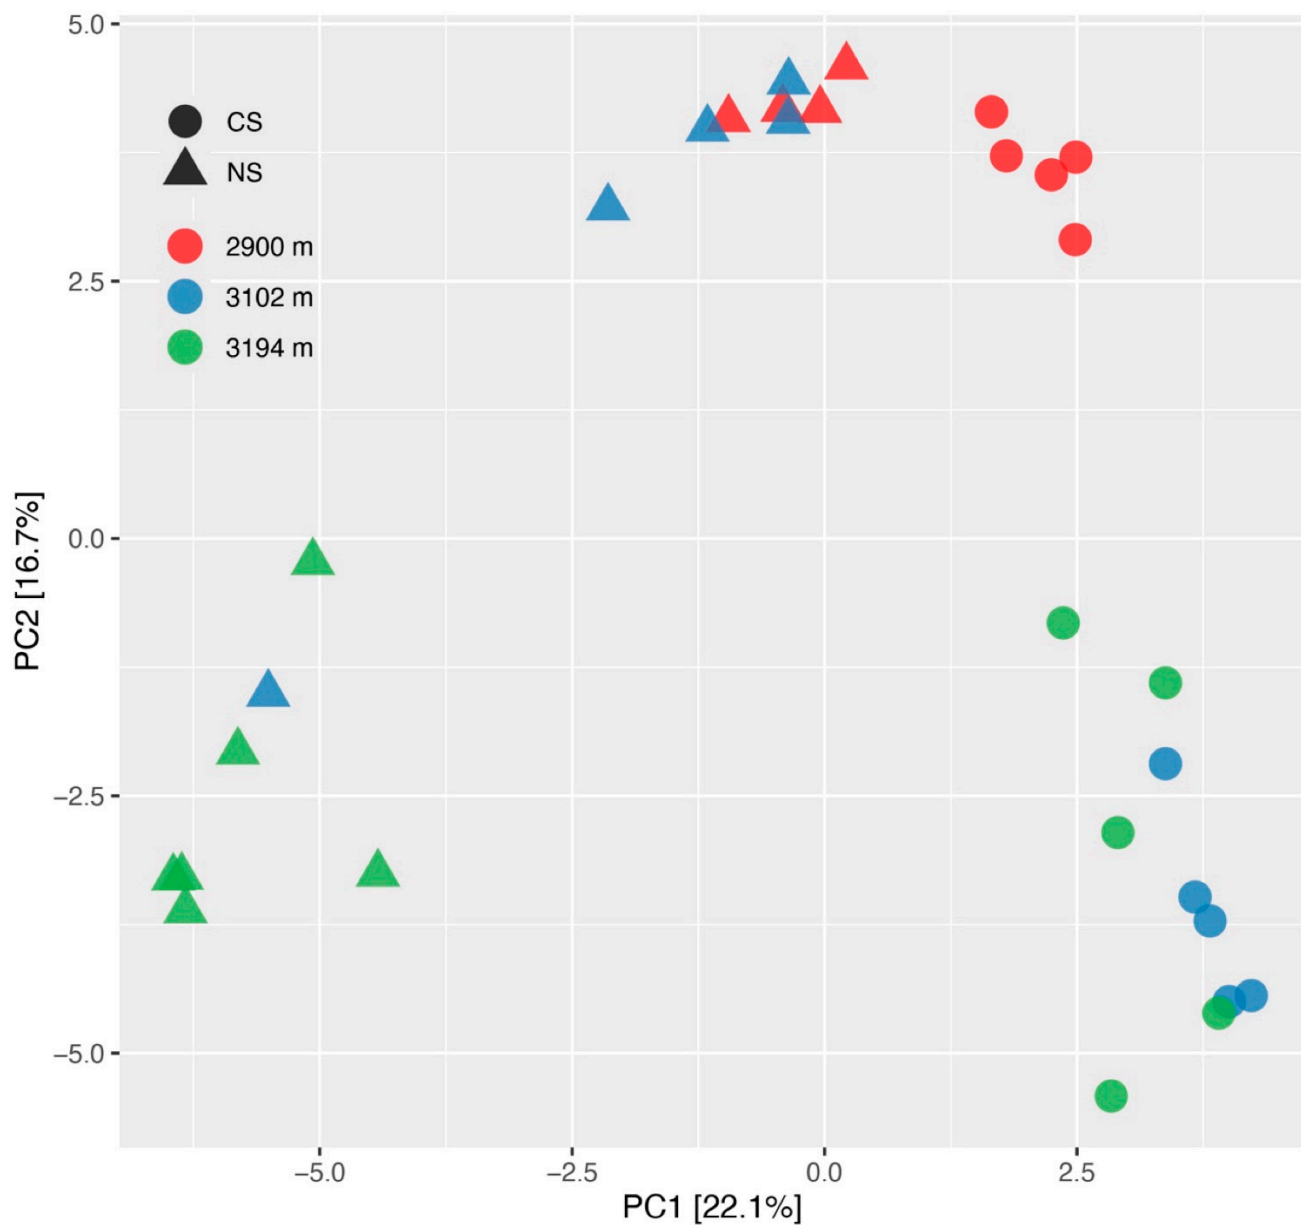

**Figure S3** A principal component analysis (PCA) showing the overall difference in soil properties including soil pH, moisture content (MC), soil temperature (ST), conductivity (CD), total organic carbon (TOC), total nitrogen (TN), ammonium nitrogen ( $\text{NH}_4^+$ -N), nitrate nitrogen ( $\text{NO}_3^-$ -N), total phosphorus (TP) and soil available phosphorus (SAP). NS: natural soils; CS: cut slope soils.

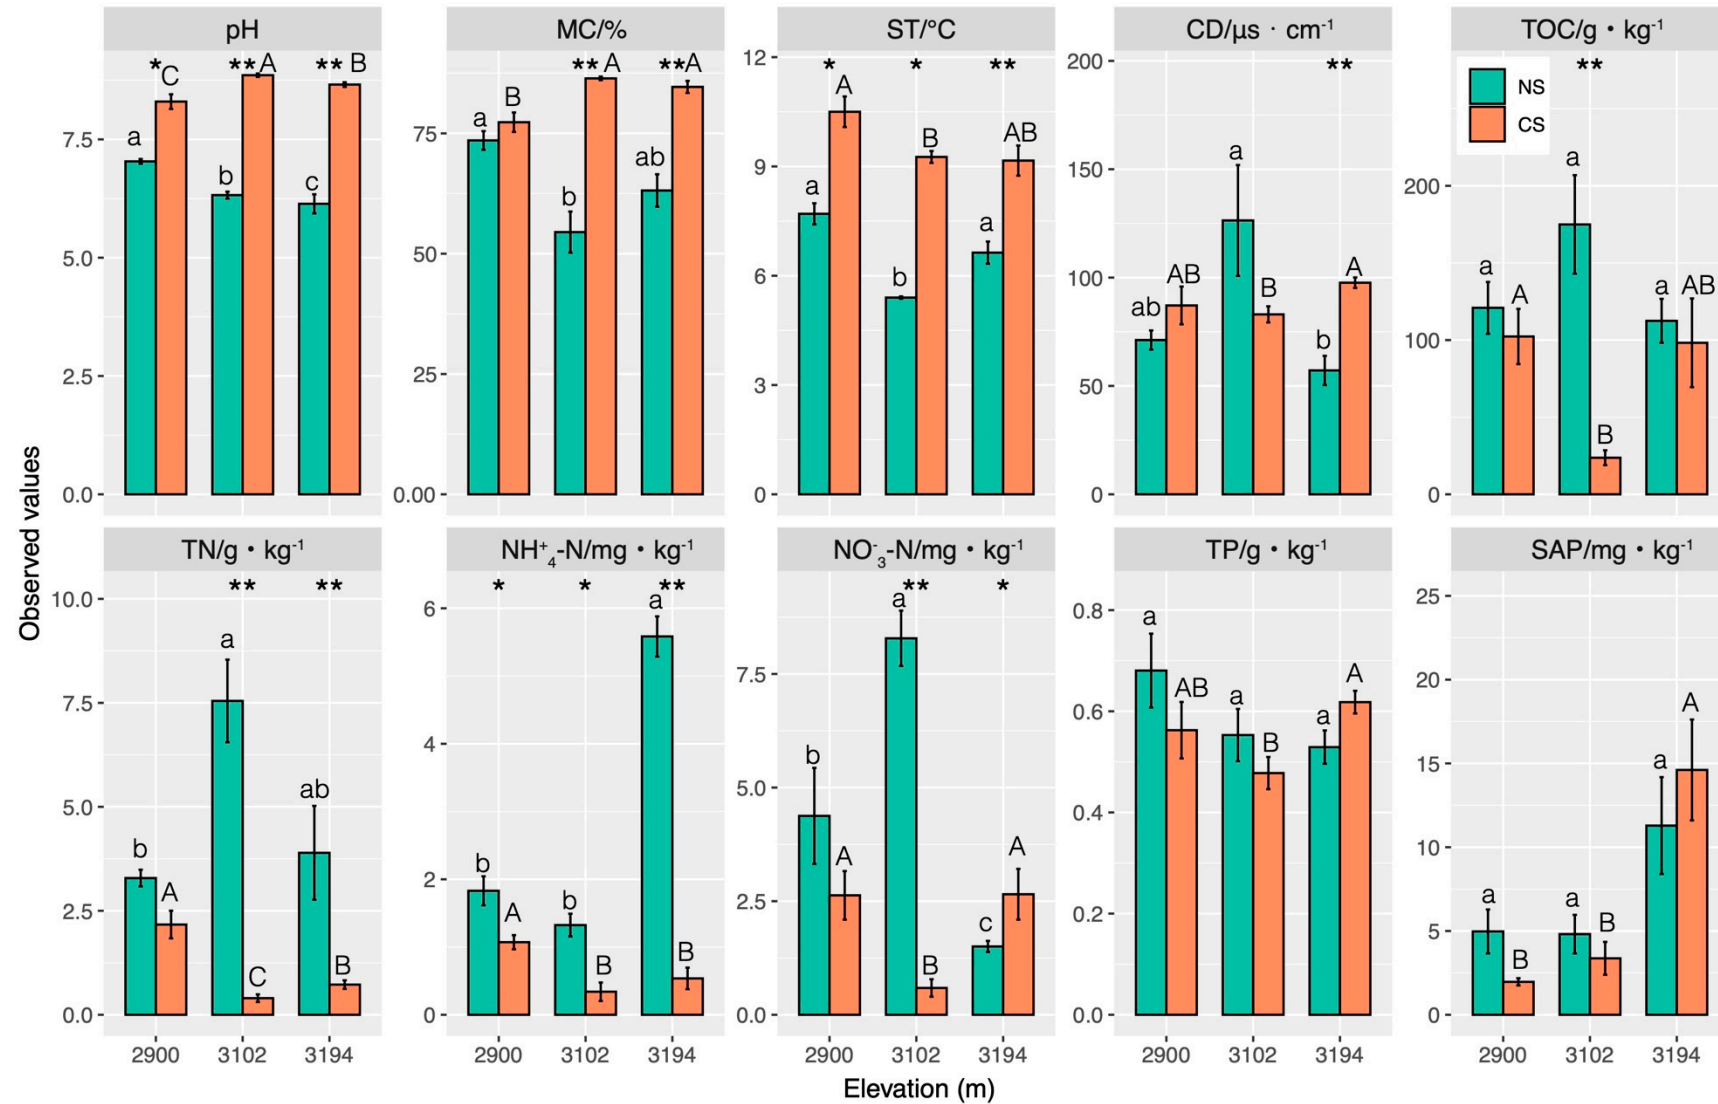

**Figure S4** Soil properties in natural (NS) and cut slope (CS) soils [1]. Asterisks represent the significant differences between NS and CS at an altitude (\*  $p < 0.05$ , \*\*  $p < 0.01$ ; Wilcoxon rank sum test). Lowercase and uppercase letters on the top of bars denote the significance of differences among three altitudes within NS and CS, respectively, and it indicates no significant difference ( $p > 0.05$ ; Wilcoxon rank sum test) between two groups if they share one same letter. MC: moisture content; ST: soil temperature; CD: conductivity; TOC: total organic carbon; TN: total nitrogen;  $\text{NH}_4^+\text{-N}$ : ammonium nitrogen;  $\text{NO}_3^+\text{-N}$ : nitrate nitrogen; TP: total phosphorus; SAP: soil available phosphorus.

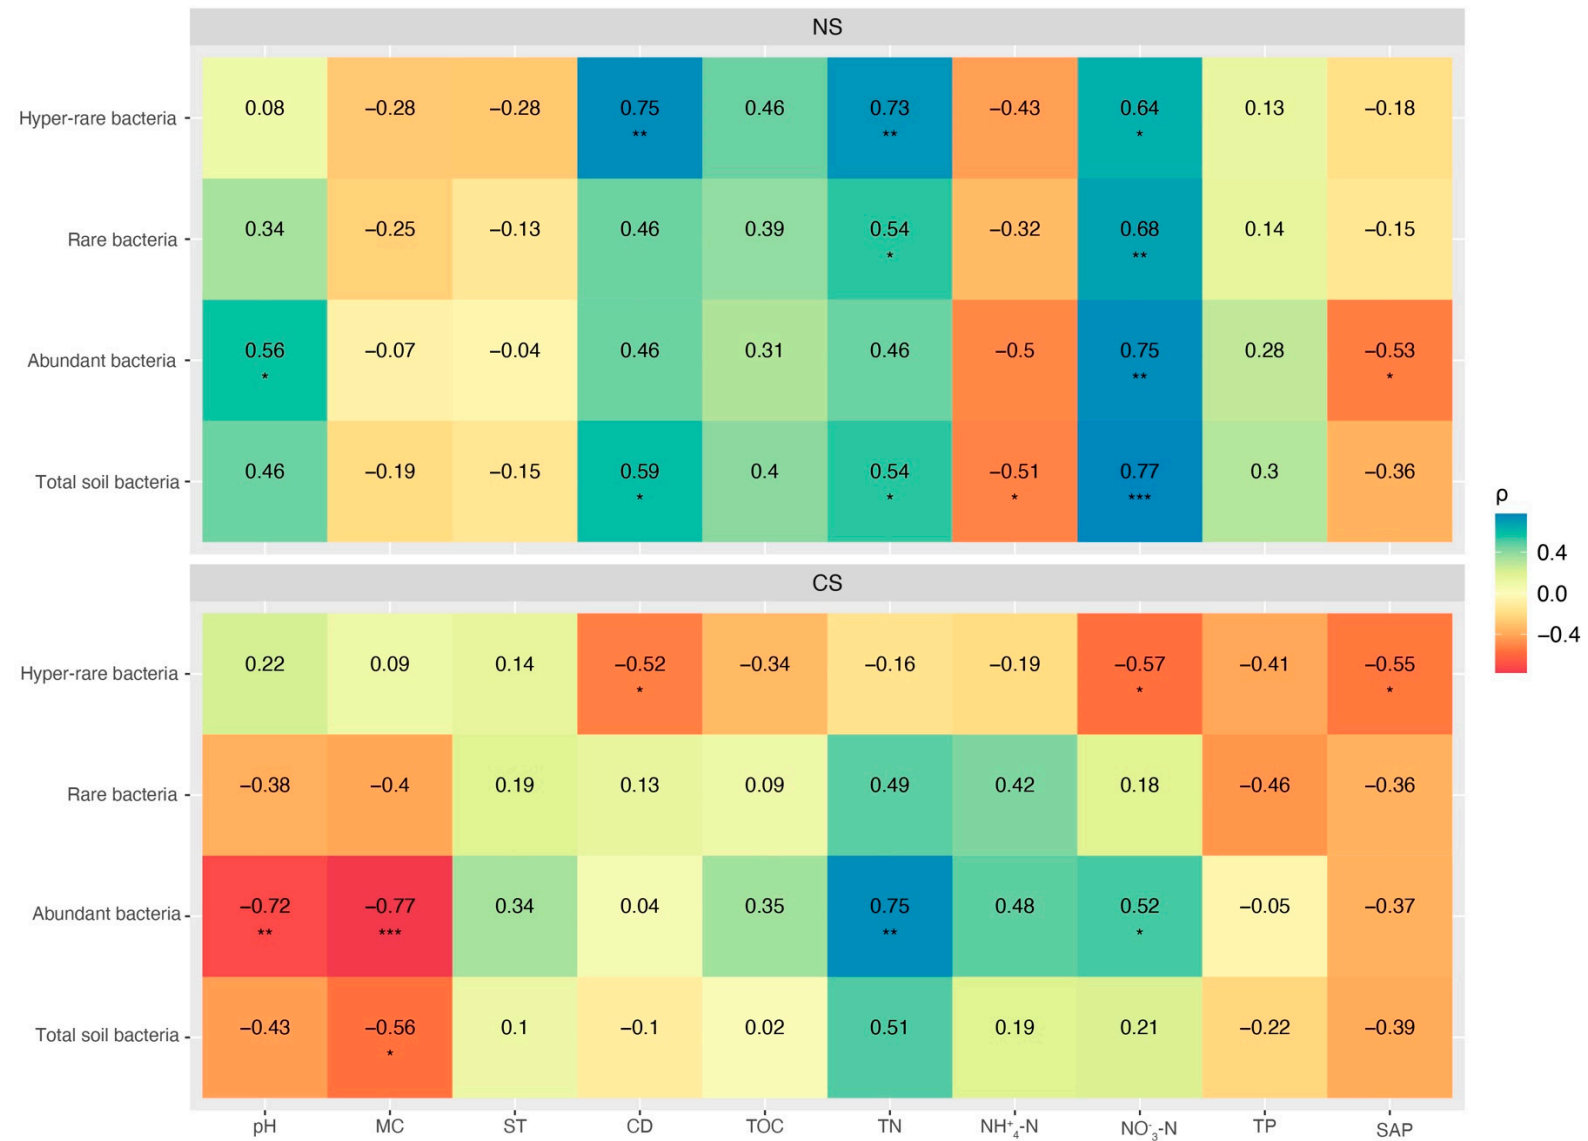

**Figure S5** A heatmap showing the Spearman correlations between soil properties and the Shannon-Wiener indices of total, abundant (RB  $\geq 0.001\%$ ), rare ( $0.0001\% \leq \text{RB} < 0.001\%$ ) and hyper-rare (RB  $< 0.0001\%$ ) bacteria. The  $\rho$  in the legend represents the correlation coefficient. MC: moisture content; ST: soil temperature; CD: conductivity; TOC: total organic carbon; TN: total nitrogen; NH<sub>4</sub><sup>+</sup>-N: ammonium nitrogen; NO<sub>3</sub><sup>-</sup>-N: nitrate nitrogen; TP: total phosphorus; SAP: soil available phosphorus. RB: average relative abundance; NS: natural soils; CS: cut slope soils. \*  $p < 0.05$ , \*\*  $p < 0.01$ , \*\*\*  $p < 0.001$ .

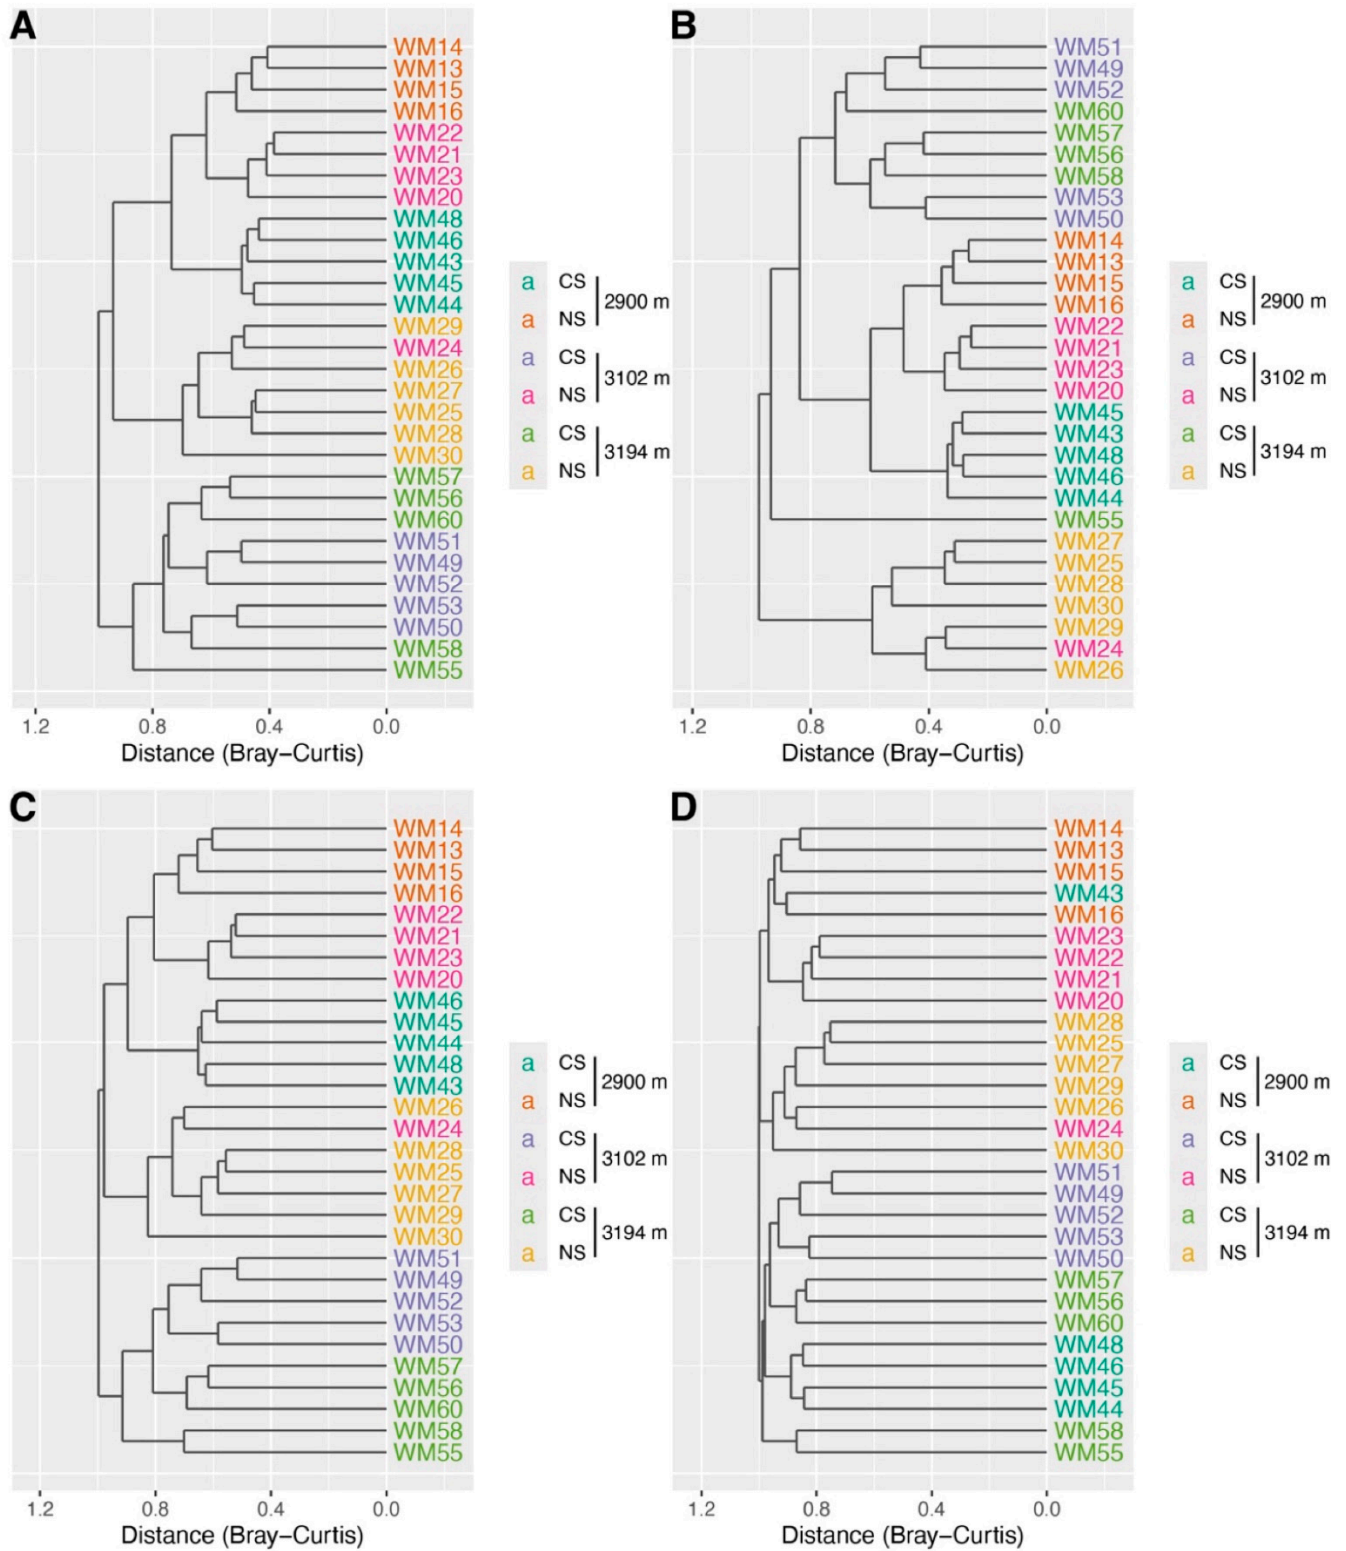

**Figure S6** Bray-Curtis distance-based clustering analysis for total (A), abundant (RB  $\geq 0.001\%$ ) (B), rare ( $0.0001\% \leq \text{RB} < 0.001\%$ ) (C) and hyper-rare (RB  $< 0.0001\%$ ) (D) bacterial communities. RB: average relative abundance; NS: natural soils; CS: cut slope soils.



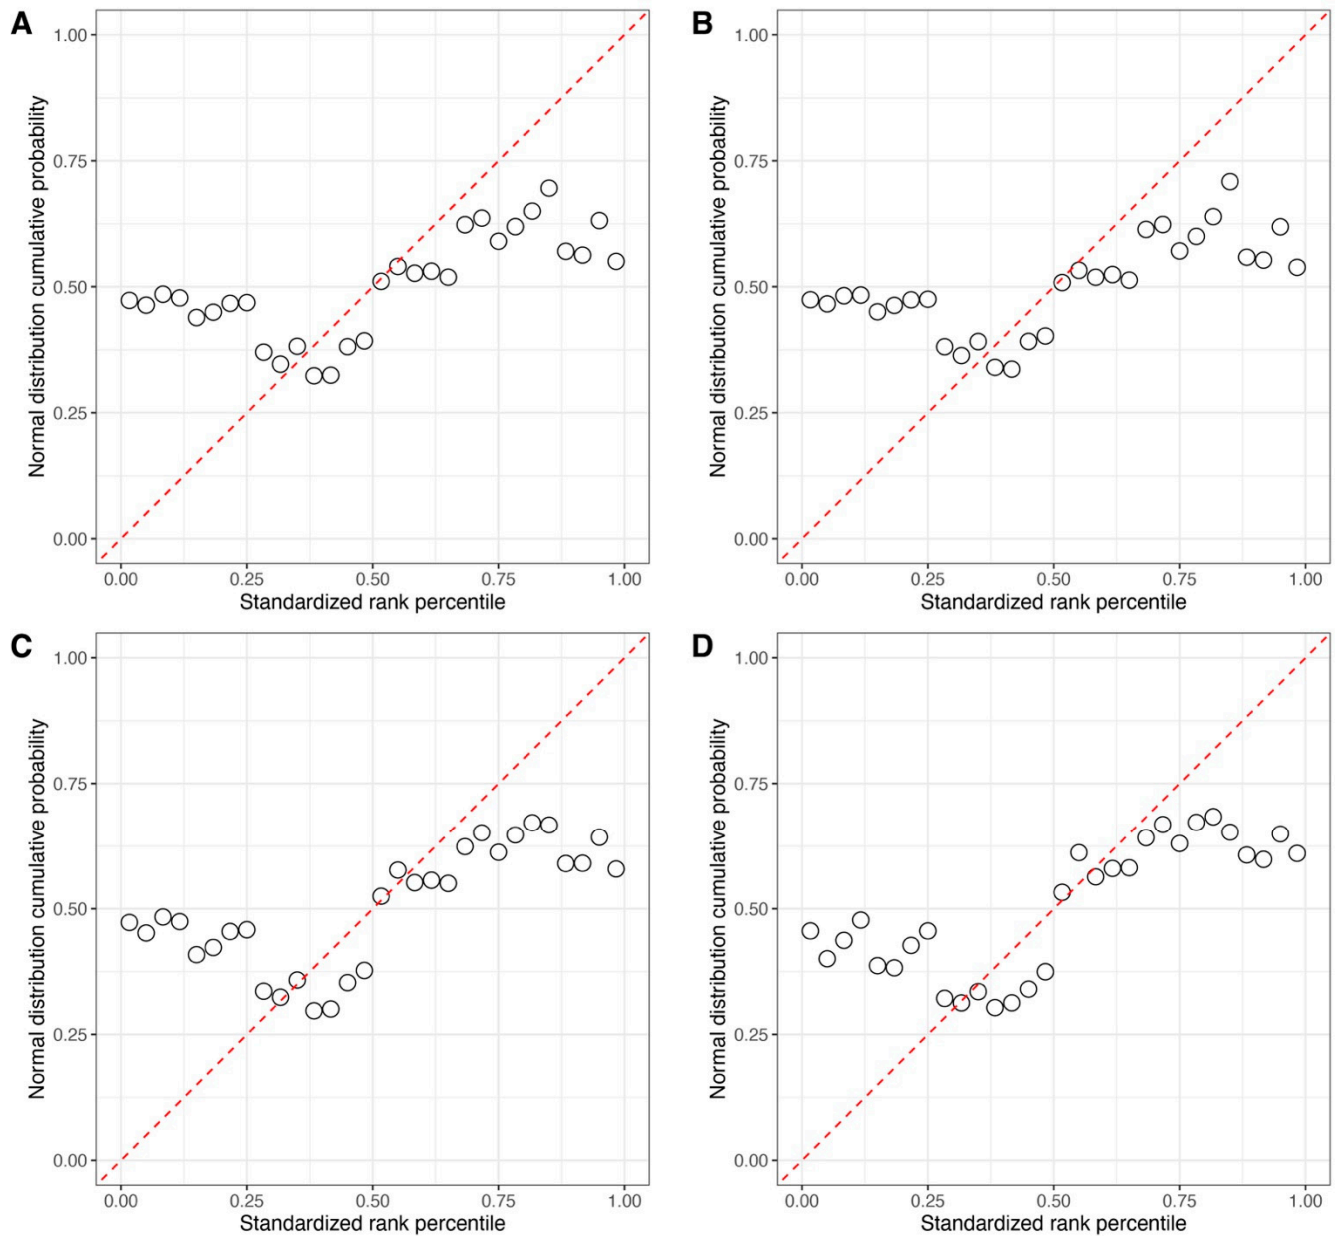

**Figure S7** The Sheppard Plot along with the Bray-Curtis distance-based non-metric multidimensional scaling (NMDS) analysis shown in **Figure 2**. **A:** total soil bacterial community; **B:** abundant (RB  $\geq 0.001\%$ ) soil bacterial community; **C:** rare ( $0.0001\% \leq \text{RB} < 0.001\%$ ) soil bacterial community; **D:** hyper-rare (RB  $< 0.0001\%$ ) soil bacterial community. RB: average relative abundance.



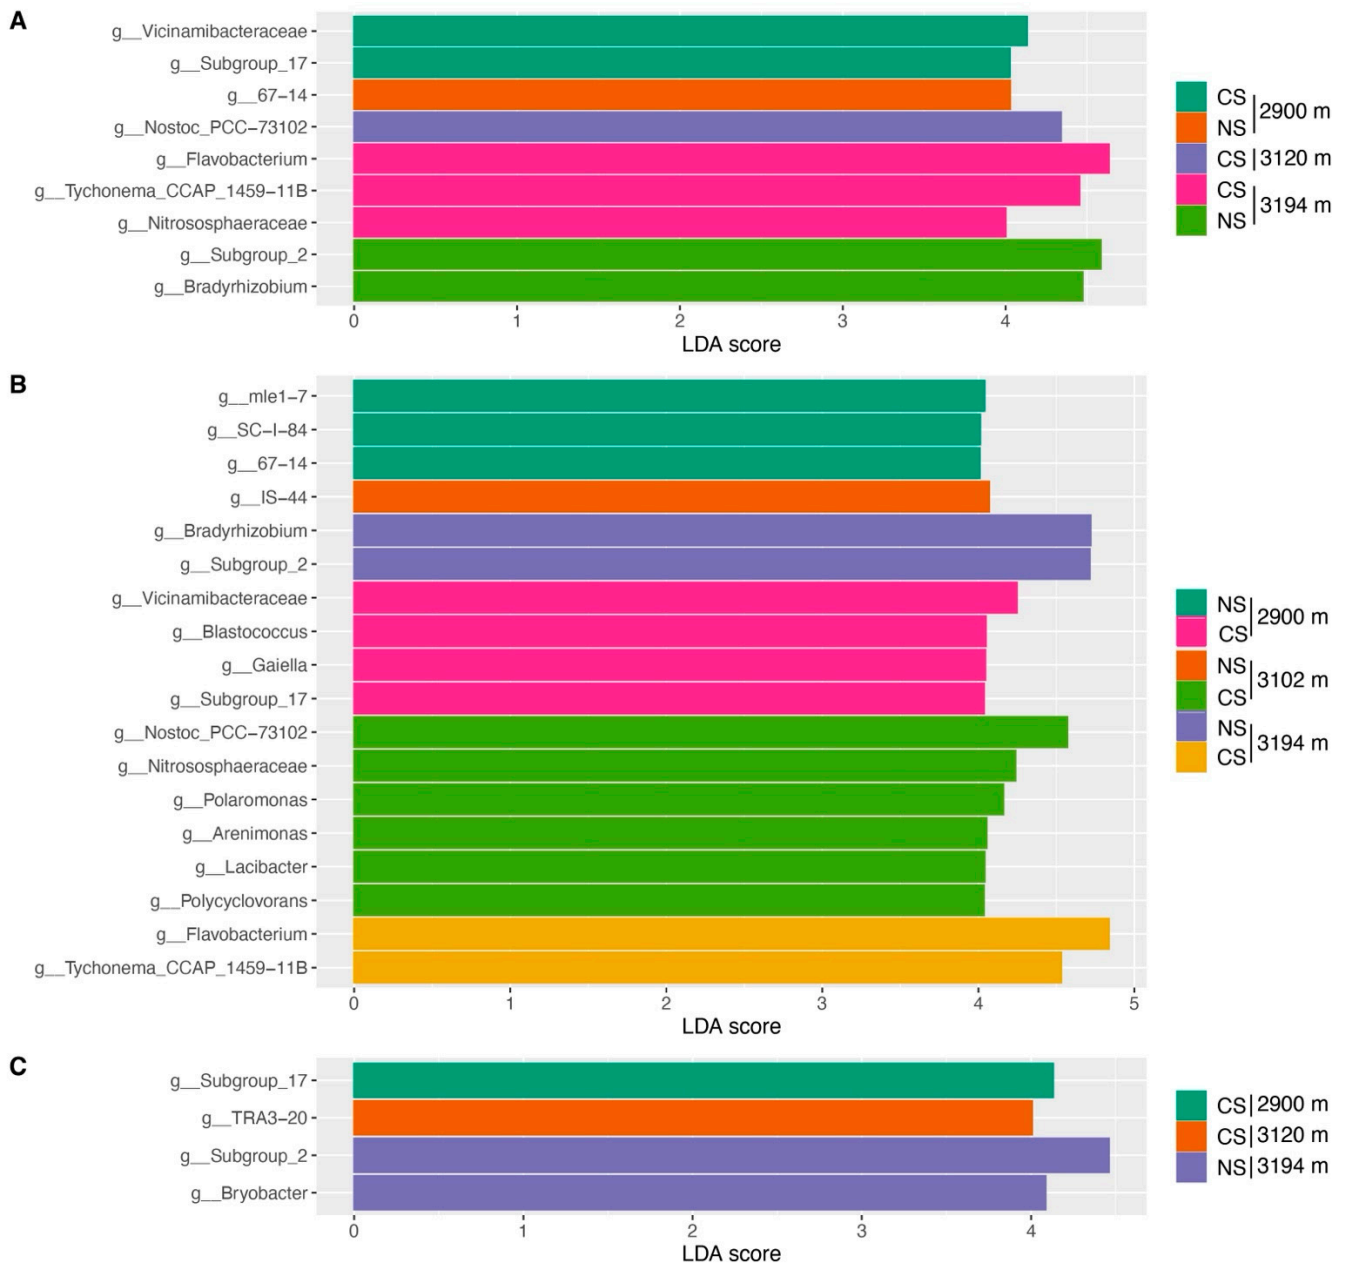

**Figure S8** Differential genera identified by the LEfSe (linear discriminant analysis effect size) analysis ( $p \leq 0.01$  and LDA score  $\geq 4$ ; no significant genus was identified under this criterion for hyper-rare bacterial communities) for total (A), abundant (RB  $\geq 0.001\%$ ) (B), and rare ( $0.0001\% \leq \text{RB} < 0.001\%$ ) (C) bacterial communities. RB: average relative abundance; NS: natural soils; CS: cut slope soils.

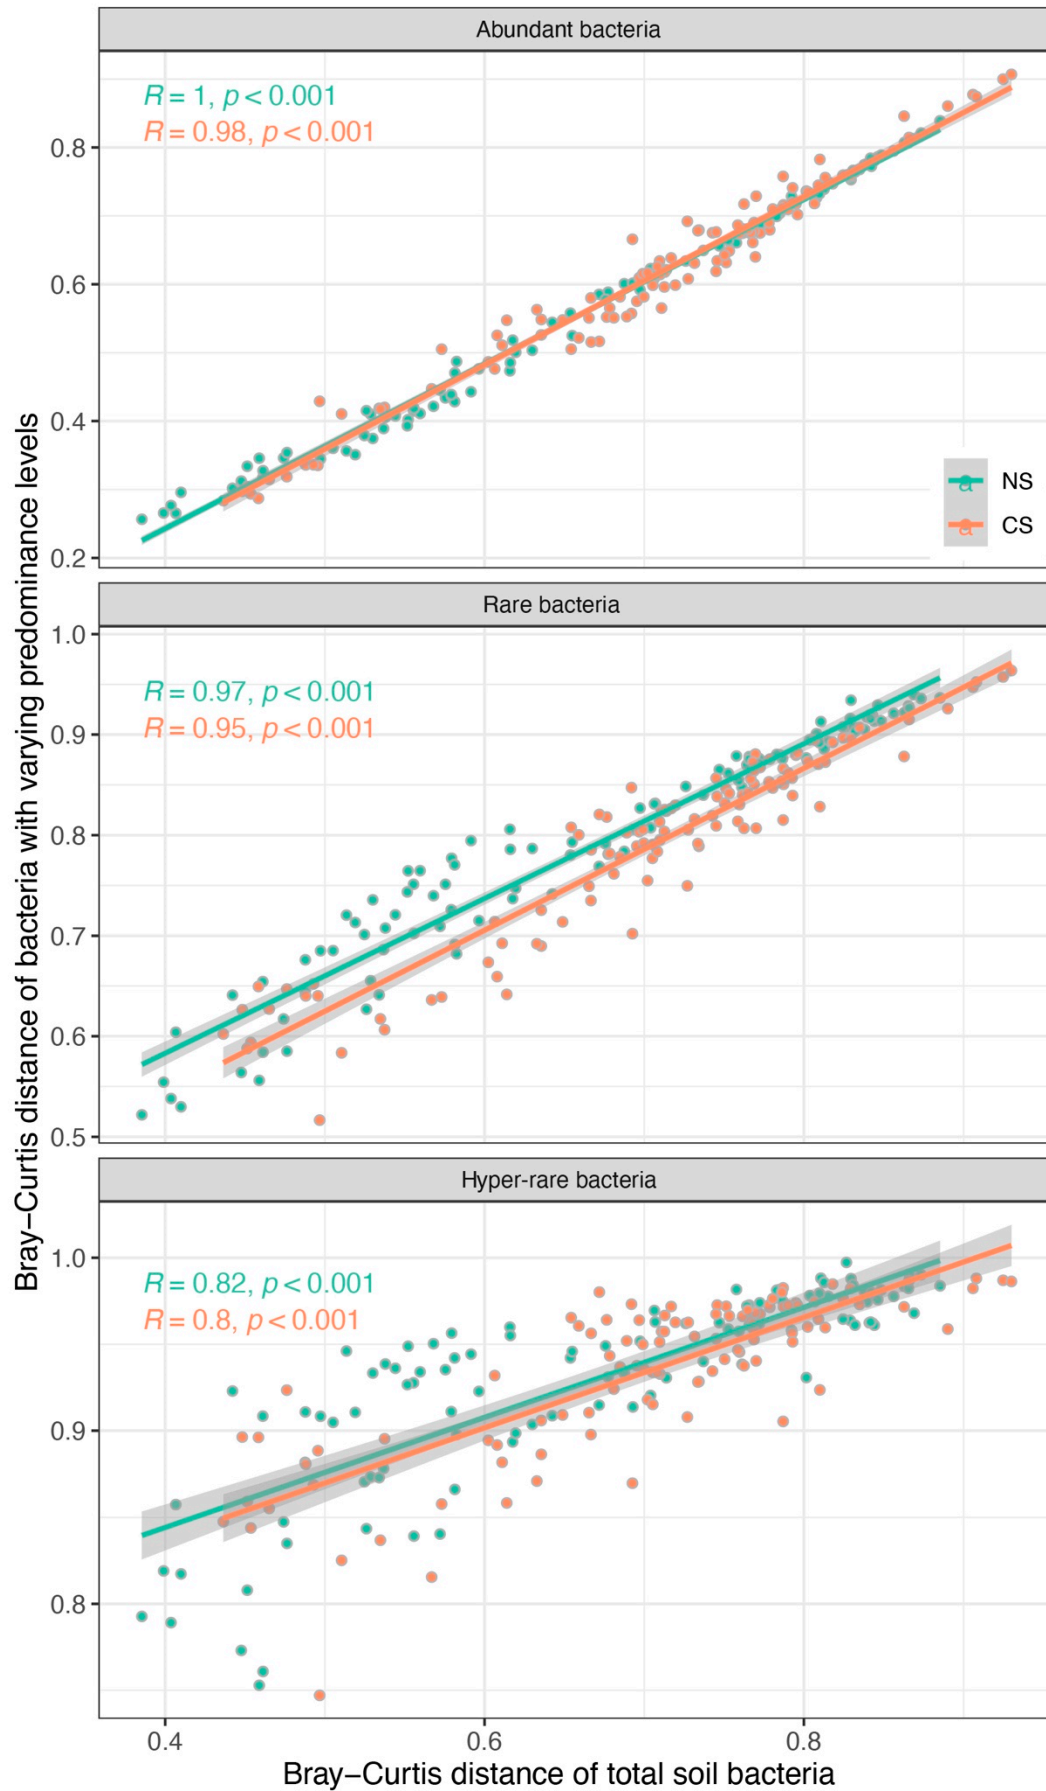

**Figure S9** The relationships between the Bray-Curtis distances of total bacterial communities and those of abundant ( $RB \geq 0.001\%$ ), rare ( $0.0001\% \leq RB < 0.001\%$ ) and hyper-rare ( $RB < 0.0001\%$ ) ones.  $R$  values and  $p$ -values represent Pearson correlation coefficients and associated significance, respectively. RB: average relative abundance; NS: natural soils; CS: cut slope soils.

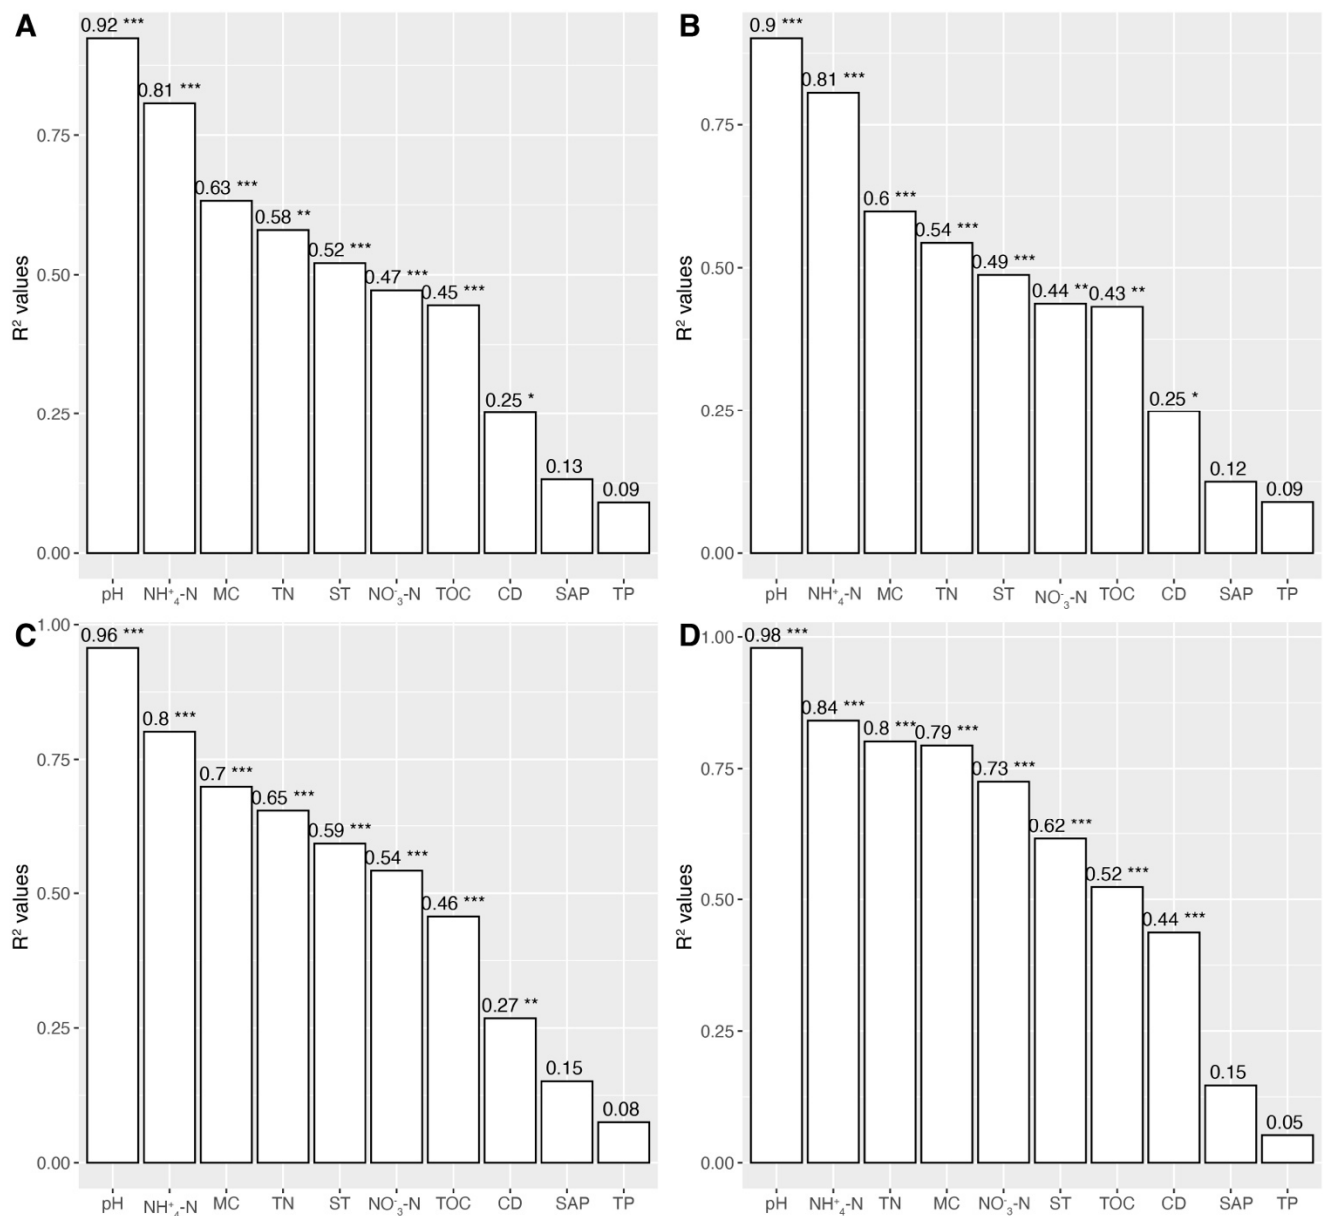

**Figure S10** The relative contributions of individual soil property to the community differences of total (A), abundant (RB ≥ 0.001%) (B), rare (0.0001% ≤ RB < 0.001%) (C) and hyper-rare (RB < 0.0001%) (D) bacteria.  $R^2$  values are calculated using the *envfit()* function of the vegan R package, and a larger  $R^2$  means a larger contribution if  $p < 0.05$ . This figure is a supplement for **Figure 4**. MC: moisture content; ST: soil temperature; CD: conductivity; TOC: total organic carbon; TN: total nitrogen; NH<sub>4</sub><sup>+</sup>-N: ammonium nitrogen; NO<sub>3</sub><sup>-</sup>-N: nitrate nitrogen; TP: total phosphorus; SAP: soil available phosphorus. RB: average relative abundance. \*  $p < 0.05$ , \*\*  $p < 0.01$ , \*\*\*  $p < 0.001$ .

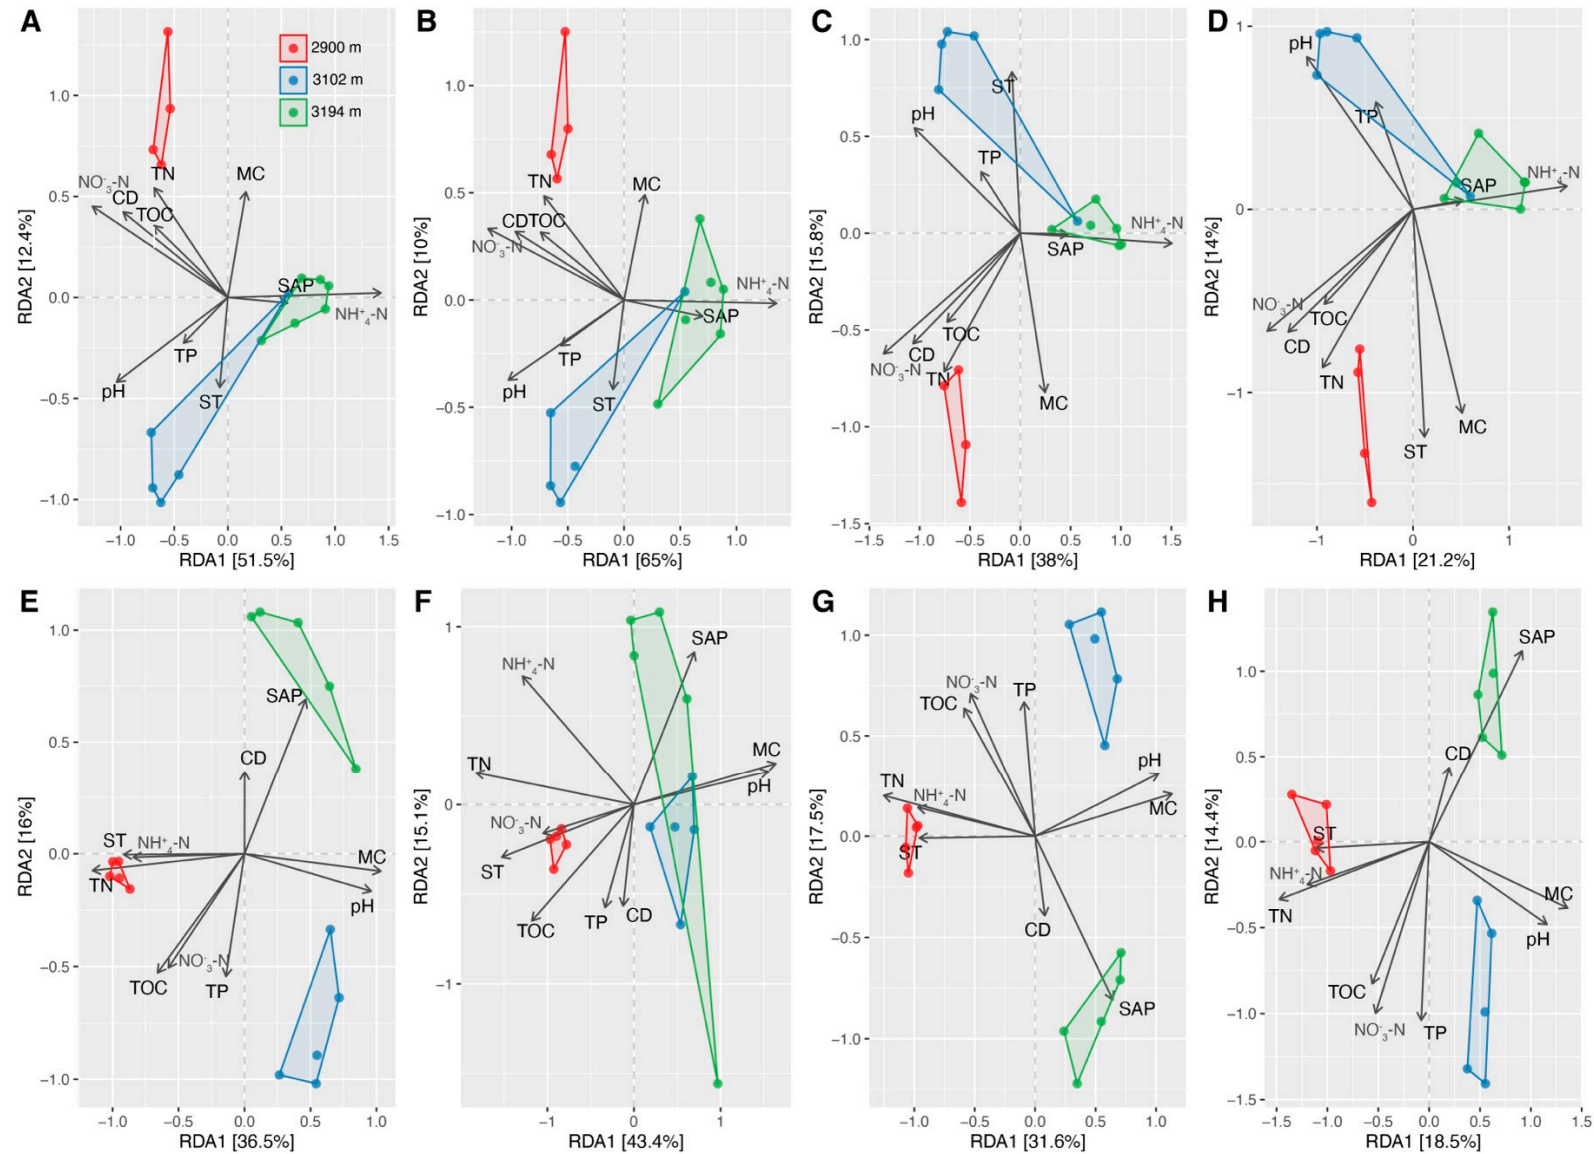

**Figure S11** Bray-Curtis distance-based redundancy analysis (RDA) for the communities of total (A), abundant ( $RB \geq 0.001\%$ ) (B), rare ( $0.0001\% \leq RB < 0.001\%$ ) (C) and hyper-rare ( $RB < 0.0001\%$ ) (D) bacteria in natural soils (NS), and for the communities of total (E), abundant (F), rare (G) and hyper-rare (H) bacteria in cut slope soils (CS). MC: moisture content; ST: soil temperature; CD: conductivity; TOC: total organic carbon; TN: total nitrogen; NH<sub>4</sub><sup>+</sup>-N: ammonium nitrogen; NO<sub>3</sub>-N: nitrate nitrogen; TP: total phosphorus; SAP: soil available phosphorus. RB: average relative abundance.

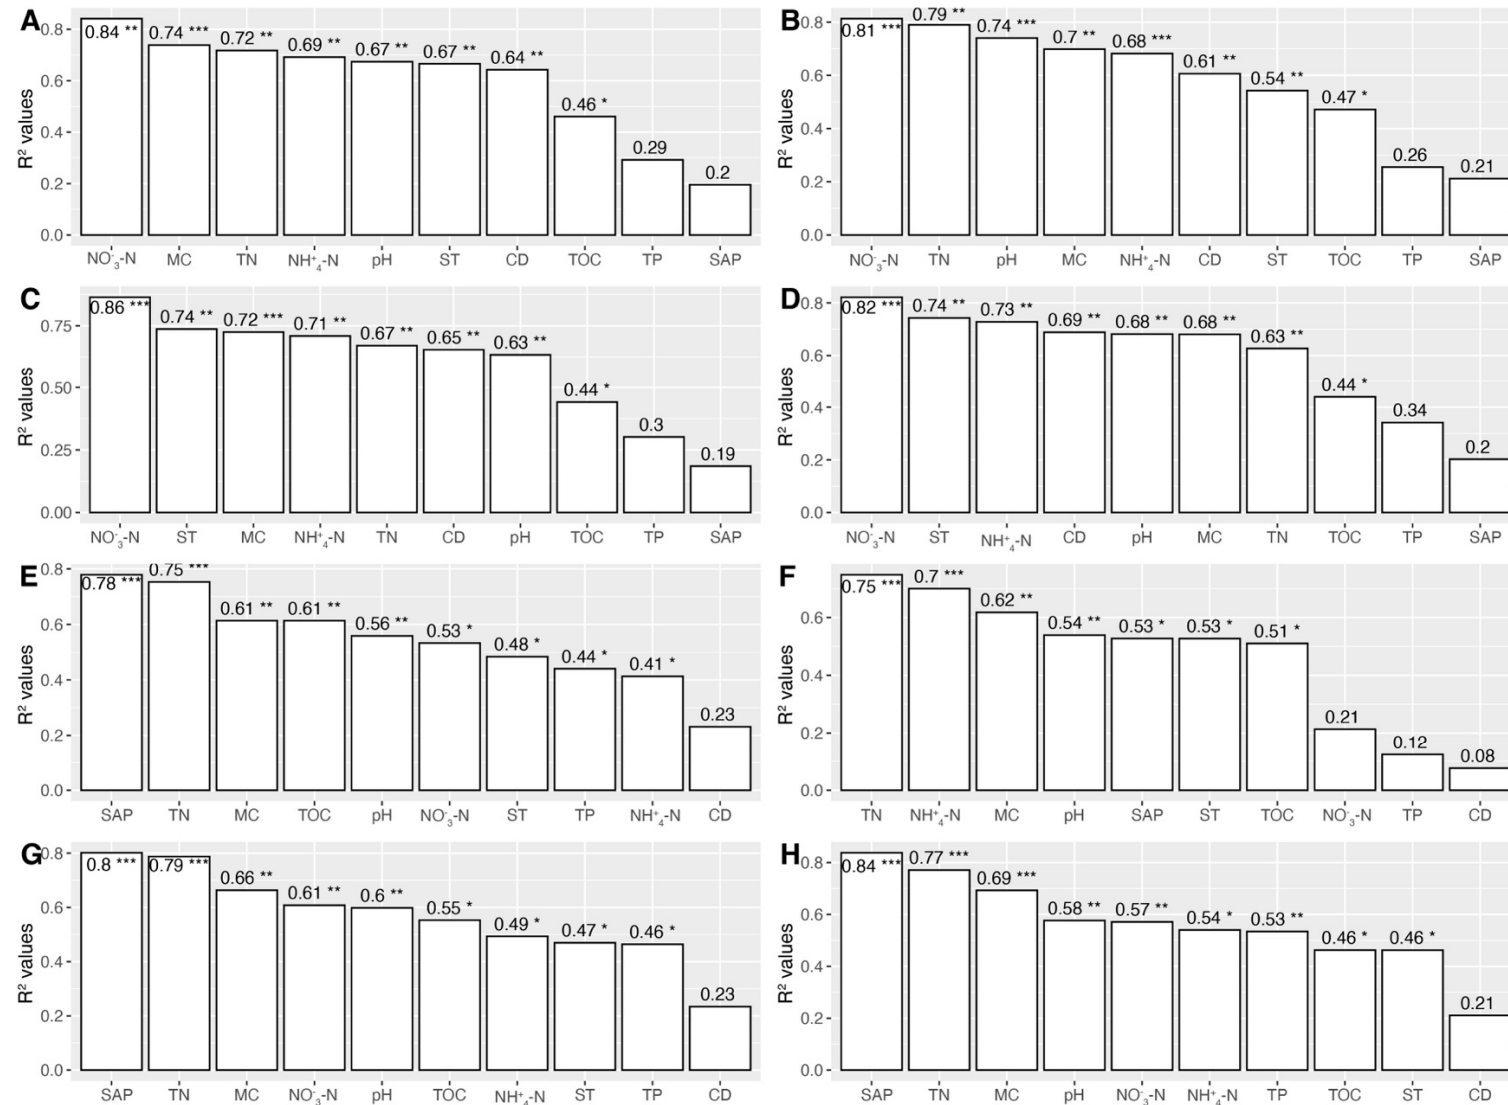

**Figure S12** The relative contributions of individual soil property to the community differences of total (A), abundant (RB ≥ 0.001%) (B), rare (0.0001% ≤ RB < 0.001%) (C) and hyper-rare (RB < 0.0001%) (D) bacteria in natural soils (NS), and the community differences of total (E), abundant (F), rare (G) and hyper-rare (H) bacteria in cut slope soils (CS). R<sup>2</sup> values are calculated using the *envfit()* function of the vegan R package, and a larger R<sup>2</sup> means a larger contribution if  $p < 0.05$ . This figure is a supplement for **Figure S11**. MC: moisture content; ST: soil temperature; CD: conductivity; TOC: total organic carbon; TN: total nitrogen; NH<sub>4</sub><sup>+</sup>-N: ammonium nitrogen; NO<sub>3</sub>-N: nitrate nitrogen; TP: total phosphorus; SAP: soil available phosphorus. RB: average relative abundance. \*  $p < 0.05$ , \*\*  $p < 0.01$ , \*\*\*  $p < 0.001$ .

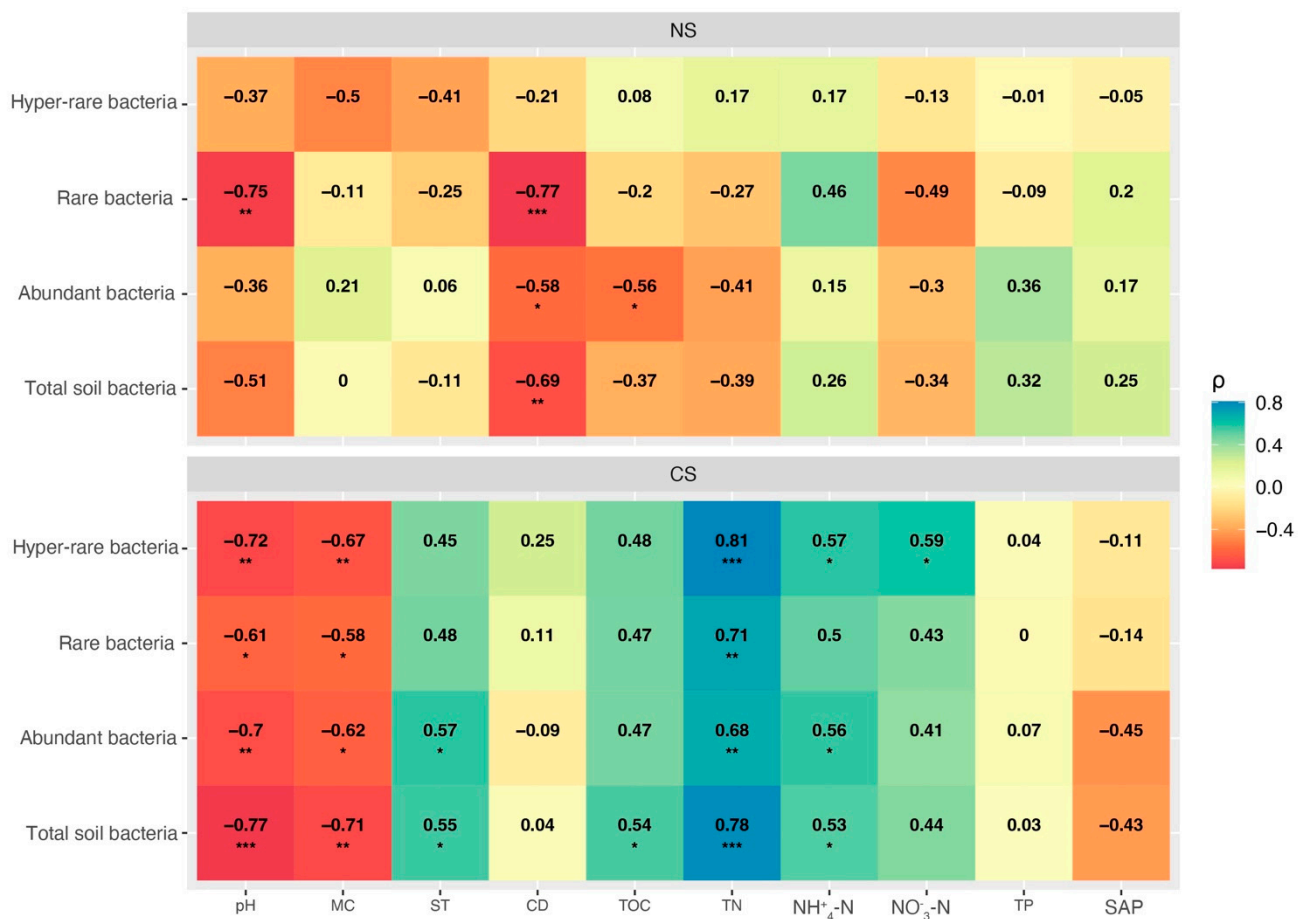

**Figure S13** A heatmap showing the Spearman correlations between soil properties and the functional redundancy of total, abundant (RB  $\geq 0.001\%$ ), rare ( $0.0001\% \leq \text{RB} < 0.001\%$ ) and hyper-rare (RB  $< 0.0001\%$ ) bacteria. The  $\rho$  in the legend represents the correlation coefficient. MC: moisture content; ST: soil temperature; CD: conductivity; TOC: total organic carbon; TN: total nitrogen; NH<sub>4</sub><sup>+</sup>-N: ammonium nitrogen; NO<sub>3</sub><sup>-</sup>-N: nitrate nitrogen; TP: total phosphorus; SAP: soil available phosphorus. RB: average relative abundance; NS: natural soils; CS: cut slope soils. \*  $p < 0.05$ , \*\*  $p < 0.01$ , \*\*\*  $p < 0.001$ .

**Table S1** Shapiro-Wilk test of normality for soil properties. The statistic and *p*-values are generated by *stats::shapiro.test()* function in R. If the *p*-value is greater than 0.05 (highlighted in the table), then it conforms to the normality hypothesis.

| Variables                       | NS        |          | CS        |          | 2900 m    |          | 3102 m    |          | 3194 m    |          |
|---------------------------------|-----------|----------|-----------|----------|-----------|----------|-----------|----------|-----------|----------|
|                                 | Statistic | <i>P</i> |
| pH                              | 0.926     | 0.234    | 0.841     | 0.013    | 0.828     | 0.042    | 0.730     | 0.002    | 0.799     | 0.009    |
| MC                              | 0.908     | 0.129    | 0.875     | 0.039    | 0.895     | 0.223    | 0.787     | 0.010    | 0.88      | 0.112    |
| ST                              | 0.904     | 0.108    | 0.9443    | 0.439    | 0.943     | 0.619    | 0.737     | 0.002    | 0.921     | 0.328    |
| CD                              | 0.767     | 0.001    | 0.973     | 0.904    | 0.931     | 0.490    | 0.749     | 0.003    | 0.887     | 0.129    |
| TOC                             | 0.893     | 0.074    | 0.905     | 0.115    | 0.957     | 0.766    | 0.857     | 0.070    | 0.983     | 0.978    |
| TN                              | 0.818     | 0.006    | 0.851     | 0.018    | 0.893     | 0.212    | 0.808     | 0.018    | 0.7316    | 0.001    |
| NH <sub>4</sub> <sup>+</sup> -N | 0.806     | 0.004    | 0.864     | 0.027    | 0.929     | 0.476    | 0.898     | 0.208    | 0.769     | 0.004    |
| NO <sub>3</sub> -N              | 0.837     | 0.0116   | 0.908     | 0.127    | 0.916     | 0.364    | 0.775     | 0.007    | 0.741     | 0.002    |
| TP                              | 0.974     | 0.909    | 0.956     | 0.625    | 0.966     | 0.861    | 0.964     | 0.830    | 0.931     | 0.422    |
| SAP                             | 0.821     | 0.007    | 0.773     | 0.002    | 0.797     | 0.019    | 0.916     | 0.328    | 0.967     | 0.853    |

MC: moisture content; ST: soil temperature; CD: conductivity; TOC: total organic carbon; TN: total nitrogen; NH<sub>4</sub><sup>+</sup>-N: ammonium nitrogen; NO<sub>3</sub>-N: nitrate nitrogen; TP: total phosphorus; SAP: soil available phosphorus. NS: natural soils; CS: cut slope soils.



**Table S2** Bartlett test of homogeneity of variances for soil properties. The statistic and *p*-values are generated by *stats::bartlett.test()* function in R. If the *p*-value is greater than 0.05 (highlighted in the table), then it conforms to the homogeneity of variance hypothesis.

| Variables                       | NS        |          | CS        |          | 2900 m    |          | 3102 m    |          | 3194 m    |          |
|---------------------------------|-----------|----------|-----------|----------|-----------|----------|-----------|----------|-----------|----------|
|                                 | Statistic | <i>P</i> |
| pH                              | 8.193     | 0.017    | 8.483     | 0.014    | 3.454     | 0.063    | 1.677     | 0.195    | 6.321     | 0.012    |
| MC                              | 2.091     | 0.352    | 7.522     | 0.023    | 0.070     | 0.792    | 12.449    | 0.0004   | 3.725     | 0.054    |
| ST                              | 12.194    | 0.003    | 3.167     | 0.205    | 0.650     | 0.420    | 6.999     | 0.008    | 0.186     | 0.666    |
| CD                              | 10.601    | 0.005    | 5.966     | 0.051    | 1.592     | 0.207    | 8.928     | 0.003    | 3.918     | 0.048    |
| TOC                             | 2.759     | 0.252    | 8.169     | 0.017    | 0.090     | 0.764    | 8.685     | 0.003    | 1.468     | 0.226    |
| TN                              | 7.117     | 0.028    | 7.533     | 0.023    | 1.031     | 0.310    | 12.060    | 0.001    | 13.130    | 0.0002   |
| NH <sub>4</sub> <sup>+</sup> -N | 1.958     | 0.376    | 0.614     | 0.736    | 1.099     | 0.295    | 0.151     | 0.698    | 1.810     | 0.179    |
| NO <sub>3</sub> <sup>-</sup> -N | 10.6478   | 0.005    | 3.782     | 0.151    | 0.968     | 0.325    | 3.929     | 0.047    | 6.774     | 0.009    |
| TP                              | 1.244     | 0.537    | 3.049     | 0.218    | 0.075     | 0.784    | 0.796     | 0.372    | 0.863     | 0.353    |
| SAP                             | 5.040     | 0.080    | 16.301    | 0.0002   | 6.866     | 0.009    | 0.091     | 0.763    | 0.010     | 0.921    |

**Table S3** Shapiro-Wilk test of normality, and Bartlett test of homogeneity of variances for Shannon-Wiener index. The statistic and *p*-values are generated by *stats::shapiro.test()* and *stats::bartlett.test()* functions in R, respectively. If the *p*-value is greater than 0.05 (highlighted in the table), then it conforms the hypothesis about normality or homogeneity of variance.

| Community type      | Groups | Shapiro-Wilk test |          | Bartlett test |          |
|---------------------|--------|-------------------|----------|---------------|----------|
|                     |        | Statistic         | <i>P</i> | Statistic     | <i>P</i> |
| Total soil bacteria | NS     | 0.931             | 0.286    | 1.892         | 0.388    |
|                     | CS     | 0.719             | 0.000    | 15.220        | 0.00     |
|                     | 2900 m | 0.960             | 0.802    | 0.102         | 0.750    |
|                     | 3102 m | 0.965             | 0.846    | 0.017         | 0.896    |
|                     | 3194 m | 0.853             | 0.047    | 8.409         | 0.004    |
| Abundant bacteria   | NS     | 0.814             | 0.006    | 4.075         | 0.130    |
|                     | CS     | 0.775             | 0.002    | 19.760        | 0        |
|                     | 2900 m | 0.938             | 0.564    | 0.370         | 0.543    |
|                     | 3102 m | 0.887             | 0.157    | 0.185         | 0.667    |
|                     | 3194 m | 0.860             | 0.057    | 8.882         | 0.003    |
| Rare bacteria       | NS     | 0.886             | 0.059    | 3.007         | 0.222    |
|                     | CS     | 0.741             | 0.001    | 6.997         | 0.030    |
|                     | 2900 m | 0.977             | 0.946    | 0.875         | 0.350    |
|                     | 3102 m | 0.976             | 0.940    | 0.004         | 0.949    |
|                     | 3194 m | 0.775             | 0.004    | 3.213         | 0.073    |
| Hyper-rare bacteria | NS     | 0.947             | 0.476    | 0.498         | 0.780    |
|                     | CS     | 0.940             | 0.387    | 0.581         | 0.748    |
|                     | 2900 m | 0.914             | 0.343    | 1.342         | 0.247    |
|                     | 3102 m | 0.945             | 0.605    | 0.112         | 0.737    |
|                     | 3194 m | 0.956             | 0.724    | 0.044         | 0.833    |

**Table S4** Shapiro-Wilk test of normality, and Bartlett test of homogeneity of variances for functional redundancy. The statistic and *p*-values are generated by *stats::shapiro.test()* and *stats::bartlett.test()* functions in R, respectively. If the *p*-value is greater than 0.05 (highlighted in the table), then it conforms the hypothesis about normality or homogeneity of variance.

| Community type      | Group  | Shapiro-Wilk test |          | Bartlett test |          |
|---------------------|--------|-------------------|----------|---------------|----------|
|                     |        | Statistic         | <i>P</i> | Statistic     | <i>P</i> |
| Hyper-rare bacteria | NS     | 0.960             | 0.696    | 1.193         | 0.551    |
|                     | CS     | 0.952             | 0.559    | 1.006         | 0.605    |
|                     | 2900 m | 0.862             | 0.100    | 1.868         | 0.172    |
|                     | 3102 m | 0.942             | 0.576    | 1.828         | 0.176    |
|                     | 3194 m | 0.903             | 0.202    | 2.273         | 0.132    |
| Rare bacteria       | NS     | 0.918             | 0.181    | 2.858         | 0.240    |
|                     | CS     | 0.928             | 0.251    | 1.580         | 0.454    |
|                     | 2900 m | 0.874             | 0.135    | 0.120         | 0.729    |
|                     | 3102 m | 0.933             | 0.475    | 1.018         | 0.313    |
|                     | 3194 m | 0.957             | 0.736    | 0.1762        | 0.675    |
| Abundant bacteria   | NS     | 0.888             | 0.062    | 1.037         | 0.595    |
|                     | CS     | 0.932             | 0.295    | 1.805         | 0.405    |
|                     | 2900 m | 0.962             | 0.818    | 0.494         | 0.482    |
|                     | 3102 m | 0.882             | 0.136    | 1.727         | 0.189    |
|                     | 3194 m | 0.878             | 0.099    | 0.002         | 0.965    |
| Total soil bacteria | NS     | 0.966             | 0.801    | 3.666         | 0.160    |
|                     | CS     | 0.950             | 0.526    | 1.597         | 0.450    |
|                     | 2900 m | 0.923             | 0.418    | 0.763         | 0.382    |
|                     | 3102 m | 0.898             | 0.210    | 1.737         | 0.188    |
|                     | 3194 m | 0.937             | 0.486    | 0.085         | 0.771    |

**Table S5** Two-way and pairwise permutational multivariate analysis of variance (PERMANOVA) based on Euclidean distances for soil properties.

|                    | Factors or comparisons      | <i>F</i> | R <sup>2</sup> | <i>P</i> |
|--------------------|-----------------------------|----------|----------------|----------|
| Two-way PERMANOVA  | Elevation                   | 4.099    | 0.155          | 0.002    |
|                    | Soil type (i.e., NS and CS) | 18.588   | 0.352          | 0.001    |
| Pairwise PERMANOVA | 2900 NS <i>vs.</i> 3102 NS  | 5.486    | 0.439          | 0.015    |
|                    | 2900 NS <i>vs.</i> 3194 NS  | 5.913    | 0.425          | 0.007    |
|                    | 3102 NS <i>vs.</i> 3194 NS  | 9.831    | 0.522          | 0.002    |
|                    | 2900 CS <i>vs.</i> 3102 CS  | 6.393    | 0.444          | 0.008    |
|                    | 2900 CS <i>vs.</i> 3194 CS  | 4.955    | 0.382          | 0.005    |
|                    | 3102 CS <i>vs.</i> 3194 CS  | 9.514    | 0.543          | 0.009    |
|                    | 2900 CS <i>vs.</i> 2900 NS  | 4.462    | 0.389          | 0.026    |
|                    | 3102 CS <i>vs.</i> 3102 NS  | 24.052   | 0.750          | 0.012    |
|                    | 3194 CS <i>vs.</i> 3194 NS  | 14.580   | 0.618          | 0.004    |

**Table S6** The two-way and pairwise permutational multivariate analysis of variance (PERMANOVA) based on Bray-Curtis distances for bacterial communities.

|                    | Community type      | Factors or comparisons   | <i>F</i> | R <sup>2</sup> | <i>P</i> |
|--------------------|---------------------|--------------------------|----------|----------------|----------|
| Two-way PERMANOVA  | Hyper-rare bacteria | Elevation                | 1.934    | 0.119          | 0.001    |
|                    |                     | Soil type                | 2.734    | 0.084          | 0.001    |
|                    | Rare bacteria       | Elevation                | 3.835    | 0.189          | 0.001    |
|                    |                     | Soil type                | 6.832    | 0.169          | 0.001    |
|                    | Abundant bacteria   | Elevation                | 5.940    | 0.235          | 0.001    |
|                    |                     | Soil type                | 12.754   | 0.252          | 0.001    |
|                    | Total soil bacteria | Elevation                | 4.720    | 0.212          | 0.001    |
|                    |                     | Soil type                | 9.114    | 0.205          | 0.001    |
| Pairwise PERMANOVA | Hyper-rare bacteria | 2900NS <i>vs.</i> 3102NS | 1.538    | 0.180          | 0.018    |
|                    |                     | 2900NS <i>vs.</i> 3194NS | 1.975    | 0.198          | 0.002    |
|                    |                     | 3102NS <i>vs.</i> 3194NS | 1.972    | 0.180          | 0.005    |
|                    |                     | 2900CS <i>vs.</i> 3102CS | 2.125    | 0.210          | 0.008    |
|                    |                     | 2900CS <i>vs.</i> 3194CS | 2.014    | 0.201          | 0.004    |
|                    |                     | 3102CS <i>vs.</i> 3194CS | 1.664    | 0.172          | 0.01     |
|                    |                     | 2900NS <i>vs.</i> 2900CS | 1.513    | 0.178          | 0.013    |
|                    |                     | 3102NS <i>vs.</i> 3102CS | 2.392    | 0.230          | 0.012    |
|                    |                     | 3194NS <i>vs.</i> 3194CS | 2.487    | 0.217          | 0.003    |
|                    | Rare bacteria       | 2900NS <i>vs.</i> 3102NS | 2.360    | 0.252          | 0.011    |
|                    |                     | 2900NS <i>vs.</i> 3194NS | 4.560    | 0.363          | 0.004    |
|                    |                     | 3102NS <i>vs.</i> 3194NS | 3.858    | 0.300          | 0.007    |
|                    |                     | 2900CS <i>vs.</i> 3102CS | 4.827    | 0.376          | 0.006    |
|                    |                     | 2900CS <i>vs.</i> 3194CS | 4.084    | 0.338          | 0.013    |
|                    |                     | 3102CS <i>vs.</i> 3194CS | 2.602    | 0.245          | 0.012    |
|                    |                     | 2900NS <i>vs.</i> 2900CS | 2.437    | 0.258          | 0.005    |
|                    |                     | 3102NS <i>vs.</i> 3102CS | 5.636    | 0.413          | 0.007    |
|                    |                     | 3194NS <i>vs.</i> 3194CS | 5.701    | 0.388          | 0.004    |
|                    | Abundant bacteria   | 2900NS <i>vs.</i> 3102NS | 2.388    | 0.254          | 0.01     |
|                    |                     | 2900NS <i>vs.</i> 3194NS | 11.718   | 0.594          | 0.004    |
|                    |                     | 3102NS <i>vs.</i> 3194NS | 7.020    | 0.438          | 0.004    |
|                    |                     | 2900CS <i>vs.</i> 3102CS | 9.563    | 0.545          | 0.004    |
|                    |                     | 2900CS <i>vs.</i> 3194CS | 5.492    | 0.407          | 0.008    |
|                    |                     | 3102CS <i>vs.</i> 3194CS | 2.141    | 0.211          | 0.012    |
|                    |                     | 2900NS <i>vs.</i> 2900CS | 4.510    | 0.392          | 0.006    |
|                    |                     | 3102NS <i>vs.</i> 3102CS | 8.926    | 0.527          | 0.008    |
|                    |                     | 3194NS <i>vs.</i> 3194CS | 9.644    | 0.517          | 0.002    |
|                    | Total soil bacteria | 2900NS <i>vs.</i> 3102NS | 2.343    | 0.251          | 0.02     |
|                    |                     | 2900NS <i>vs.</i> 3194NS | 7.203    | 0.474          | 0.005    |
|                    |                     | 3102NS <i>vs.</i> 3194NS | 5.058    | 0.360          | 0.005    |
|                    |                     | 2900CS <i>vs.</i> 3102CS | 6.426    | 0.445          | 0.009    |
| Paired PERMANOVA   | Total soil bacteria | 2900CS <i>vs.</i> 3194CS | 4.639    | 0.367          | 0.007    |
|                    |                     | 3102CS <i>vs.</i> 3194CS | 2.287    | 0.222          | 0.011    |
|                    |                     | 2900NS <i>vs.</i> 2900CS | 3.083    | 0.306          | 0.007    |
|                    |                     | 3102NS <i>vs.</i> 3102CS | 6.749    | 0.458          | 0.008    |

## References

1. Liao H, Li C, Ai Y, Li X. Soil bacterial responses to disturbance are enlarged by altitude in a mountain ecosystem. *Journal of Soils and Sediments* **2023**, 23(11), 3820-3831.
